# Supplementary material
Source: HighWire-hosted journal article supplement (https://hw-f5-jim.highwire.org/content/jim-2020-001525)
Supplement: inline-supplementary-material-1 [file inline-supplementary-material-1.pdf]

**Supplement to An ALLY in fighting COVID-19: Magnitude of Albumin Decline and Lymphopenia (ALLY)  
Predict Progression to Critical Disease**

**Supplemental Table 1: Additional Baseline Results**

| Variable                                        | Disease Severity on Admission: |                   |                    | P-value |
|-------------------------------------------------|--------------------------------|-------------------|--------------------|---------|
|                                                 | Moderate<br>(N=59)             | Serious<br>(N=34) | Critical<br>(N=10) |         |
| <b>Clinical Presentation</b>                    |                                |                   |                    |         |
| Clinical Score                                  | 3 [3, 5]                       | 4 [3, 5]          | 3 [2, 4]           | 0.61    |
| Anorexia                                        | 8 (13.6%)                      | 10 (29.4%)        | 4 (40%)            | 0.05    |
| Chest Pain                                      | 10 (17.0%)                     | 3 (8.8%)          | 1 (10%)            | 0.63    |
| Cough                                           | 44 (74.6%)                     | 30 (88.2%)        | 7 (70%)            | 0.22    |
| Diarrhea                                        | 14 (23.7%)                     | 9 (26.5%)         | 3 (30%)            | 0.84    |
| Fever                                           | 47 (79.7%)                     | 28 (82.4%)        | 8 (80%)            | 1.00    |
| Headache                                        | 11 (18.6%)                     | 4 (11.8%)         | 0 (0%)             | 0.38    |
| Myalgia                                         | 4 (6.8%)                       | 9 (26.5%)         | 3 (30%)            | 0.78    |
| Rash                                            | 0 (0%)                         | 1 (2.9%)          | 0 (0%)             | 0.43    |
| Shortness of Breath                             | 40 (67.8%)                     | 25 (73.5%)        | 5 (50%)            | 0.38    |
| Nausea/Vomiting                                 | 15 (25.4%)                     | 8 (23.5%)         | 2 (20%)            | 1.00    |
| <b>Laboratory Features</b>                      |                                |                   |                    |         |
| BNP (pg/mL)                                     | 51 [18, 118]                   | 48 [22, 124]      | 82 [48, 129]       | 0.61    |
| Total Bilirubin (mg/dL)                         | 0.5 [0.4, 0.7]                 | 0.6 [0.4, 0.9]    | 0.6 [0.3, 0.8]     | 0.76    |
| Troponin-I (ng/mL)                              | 0.02 [0.01, 0.02]              | 0.02 [0.01, 0.05] | 0.04 [0.02, 0.06]  | 0.24    |
| <b>Admission Details</b>                        |                                |                   |                    |         |
| Covid-19 RT-PCR Specimen Source, Nasopharyngeal | 55 (93.2%)                     | 33 (97.1%)        | 10 (100%)          | 0.79    |
| Readmission, 30-day                             | 2 (3.4%)                       | 5 (14.7%)         | 1 (10%)            | 0.11    |
| IMV Duration (d)                                | 8 [7, 25]                      | 16 [9, 29]        | 14 [6, 18]         | 0.51    |

**Supplemental Table 2: Comparison of demographic, clinical, and laboratory factors between training and validation cohorts**

| Variable                               | Cohort            |                   | P-value |
|----------------------------------------|-------------------|-------------------|---------|
|                                        | Derivation (N=93) | Validation (N=60) |         |
| <b>Demographics</b>                    |                   |                   |         |
| Age (y)                                | 58 [49, 67]       | 71 [52, 86]       | 0.001   |
| BMI (kg·m <sup>-2</sup> )              | 30.9 [26.7, 36.0] | 28.3 [24.3, 34.2] | 0.16    |
| Ethnicity, Hispanic or Latino          | 22 (23.7%)        | 15 (25.0%)        | 0.99    |
| Male Gender                            | 56 (60.2%)        | 30 (50%)          | 0.28    |
| Race                                   |                   |                   | 0.52    |
| Black or African American              | 32 (34.4%)        | 17 (28.3%)        |         |
| White or Caucasian                     | 52 (55.9%)        | 39 (65%)          |         |
| Other                                  | 9 (9.7%)          | 4 (6.7%)          |         |
| <b>Admission Clinical Presentation</b> |                   |                   |         |
| Blood Pressure, Systolic (mmHg)        | 130 [117, 147]    | 133 [121, 144]    | 0.69    |
| Blood Pressure, Diastolic (mmHg)       | 77 [69, 86]       | 76 [66, 85]       | 0.31    |
| Clinical Score                         | 3 [3, 5]          | 3 [2, 4]          | 0.13    |
| Anorexia                               | 18 (19.4%)        | 10 (16.7%)        | 0.84    |
| Chest Pain                             | 13 (14.0%)        | 7 (11.7%)         | 0.87    |
| Cough                                  | 74 (79.6%)        | 44 (73.3%)        | 0.48    |
| Diarrhea                               | 23 (24.7%)        | 10 (16.7%)        | 0.33    |
| Fever                                  | 75 (80.7%)        | 46 (76.7%)        | 0.70    |
| Headache                               | 15 (16.1%)        | 9 (15.0%)         | 1.00    |
| Myalgia                                | 29 (68.8%)        | 17 (28.3%)        | 0.85    |
| Rash                                   | 1 (1.1%)          | 0 (0%)            | 1.00    |
| Shortness of Breath                    | 56 (69.9%)        | 39 (65.0%)        | 0.65    |
| Nausea/Vomiting                        | 23 (24.7%)        | 13 (21.7%)        | 0.81    |
| Respiratory Rate                       | 20 [18, 22]       | 20 [18, 24]       | 0.46    |
| SpO <sub>2</sub> (%)                   | 95 [94, 97]       | 96 [94, 98]       | 0.37    |
| <b>Comorbidities</b>                   |                   |                   |         |
| Comorbidity Score                      | 1 [1, 3]          | 2 [1, 3]          | 0.05    |
| Asthma                                 | 10 (10.8%)        | 7 (11.7%)         | 1.00    |
| CAD                                    | 8 (8.6%)          | 10 (16.7%)        | 0.21    |

|                                           |                   |                   |      |
|-------------------------------------------|-------------------|-------------------|------|
| Cancer                                    | 10 (10.8%)        | 9 (15.0%)         | 0.60 |
| COPD                                      | 7 (7.5%)          | 8 (13.3%)         | 0.37 |
| Diabetes                                  | 31 (33.3%)        | 18 (30%)          | 0.80 |
| Hypertension                              | 53 (57.0%)        | 39 (65.0%)        | 0.41 |
| Renal Disease                             | 18 (19.4%)        | 17 (28.3%)        | 0.27 |
| Smoker                                    | 28 (30.1%)        | 22 (36.7%)        | 0.50 |
| <b>Disease Severity on Admission</b>      |                   |                   | 0.96 |
| Moderate                                  | 59 (63.4%)        | 37 (61.7%)        |      |
| Serious                                   | 34 (36.6%)        | 23 (38.3%)        |      |
| <b>Laboratory Results</b>                 |                   |                   |      |
| Albumin (on Admission) (g/dL)             | 3.5 [3.1, 3.9]    | 3.4 [3.1, 3.6]    | 0.19 |
| Albumin Change (Baseline to Nadir) (g/dL) | -0.6 [-0.8, -0.4] | -0.4 [-0.7, -0.2] | 0.04 |
| Alkaline Phosphatase (U/L)                | 80 [59, 100]      | 85 [69, 105]      | 0.08 |
| ALT (U/L)                                 | 32 [25, 54]       | 29 [18, 48]       | 0.05 |
| AST (U/L)                                 | 39 [25, 58]       | 30 [24, 53]       | 0.13 |
| BNP (pg/mL)                               | 48 [21, 118]      | 49 [11, 148]      | 0.98 |
| Creatinine (mg/dL)                        | 1.0 [0.9, 1.4]    | 1.1 [0.9, 1.6]    | 0.29 |
| C-reactive Protein (mg/dL)                | 6.0 [3.1, 12.7]   | 8.0 [1.6, 11.5]   | 0.34 |
| Ferritin (ng/mL)                          | 435 [240, 969]    | 406 [191, 563]    | 0.64 |
| Lymphocytes (%)                           | 18 [11, 24]       | 16 [10, 23]       | 0.25 |
| Neutrophils (%)                           | 72 [65, 82]       | 76 [67, 83]       | 0.29 |
| Total Bilirubin (mg/dL)                   | 0.5 [0.4, 0.7]    | 0.5 [0.4, 0.7]    | 0.17 |
| Troponin-I (ng/mL)                        | 0.02 [0.01, 0.03] | 0.02 [0.02, 0.04] | 0.50 |
| <b>Critical Outcomes</b>                  |                   |                   |      |
| Progression to critical disease           | 18 (19.4%)        | 10 (16.7%)        | 0.84 |
| Invasive Mechanical ventilation           | 18 (19.4%)        | 9 (15.0%)         | 0.64 |
| Multi-organ Failure                       | 18 (19.4%)        | 7 (11.7%)         | 0.30 |
| Shock                                     | 13 (14.0%)        | 11 (18.3%)        | 0.62 |
| Mortality, inpatient                      | 11 (11.8%)        | 12 (20.0%)        | 0.25 |

Abbreviations: ALT, Alanine Aminotransferase; AST, Aspartate Aminotransferase; BNP, B-type Natriuretic Peptide; BMI, Body Mass Index; CAD, Coronary Artery Disease; COPD, Chronic Obstructive Pulmonary Disease; SpO<sub>2</sub>, Pulse Oximeter Oxygen Saturation;

**Figure Legends****Supplemental Figure S1: Illustration of Albumin Recovery.**

**(A)** Change of albumin over time from admission at day 0 to day 12 is presented as an illustrative case report for a patient admitted with serious COVID-19 disease. The largest delta albumin within 5 days is -0.5 at day 2. Albumin recovers above admission levels to 3.2g/dL at day 11. **(B)** Oxygen flow support by nasal cannula over time. Successful weaning to room air was achieved by day 11.

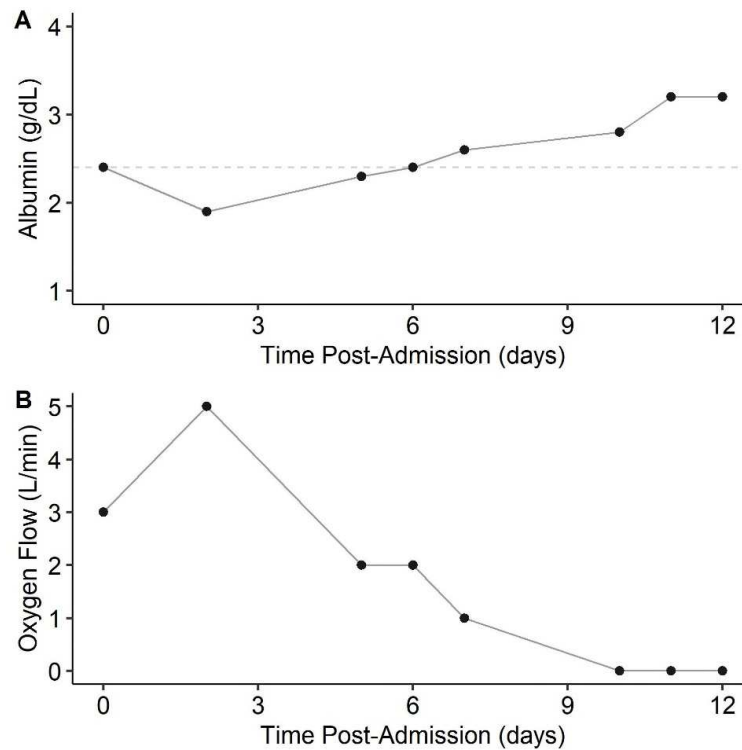**Supplemental Figure S1**

**Supplemental Table 3: Comparison of the largest delta albumin pre-critical disease status by progression of disease in derivation and validation groups**

| Variable                                                | Disease Progression:          |                               | P-value |
|---------------------------------------------------------|-------------------------------|-------------------------------|---------|
|                                                         | Remained Non-Critical (N=125) | Progressed to Critical (N=28) |         |
| <b>Laboratory Results</b>                               |                               |                               |         |
| Albumin change within 5 days (Baseline to nadir) (g/dL) | -0.5 [-0.7, -0.3]             | -0.7 [-0.9, -0.4]             | 0.007   |

**Supplemental Table 4: Sensitivity analysis of ALLY model prediction in derivation and validation groups**

| Analysis                                                                                            | Sensitivity | Specificity | AUC (95% CI)      |
|-----------------------------------------------------------------------------------------------------|-------------|-------------|-------------------|
| <b>Main Analysis:</b> Delta Albumin within 5 days and Baseline Lymphocyte                           |             |             |                   |
| Overall: Derivation and Validation                                                                  | 0.75        | 0.72        | 0.80 (0.70, 0.89) |
| <b>Sensitivity Analysis:</b> Pre-critical state Delta Albumin within 5 days and Baseline Lymphocyte |             |             |                   |
| Overall: Derivation and Validation                                                                  | 0.72        | 0.72        | 0.76 (0.66, 0.86) |

**Supplemental Table 5: Logistic regression models with total albumin change (baseline to nadir) adjusting for other potential predictors.**

| Variable                                     | Estimate | SE   | Odds Ratio<br>(95% CI) | P-value |
|----------------------------------------------|----------|------|------------------------|---------|
| <b>Model S1</b>                              |          |      |                        |         |
| Anorexia                                     | 1.29     | 0.68 | 3.63 (0.95, 14.06)     | 0.057   |
| Δ Albumin (g/dL)                             | -3.08    | 0.94 | 0.05 (0.01, 0.25)      | 0.001   |
| <b>Model S2</b>                              |          |      |                        |         |
| Diabetes Mellitus                            | 1.04     | 0.61 | 2.82 (0.87, 9.78)      | 0.09    |
| Δ Albumin (g/dL)                             | -3.12    | 0.94 | 0.04 (0.01, 0.24)      | <0.001  |
| <b>Model S3</b>                              |          |      |                        |         |
| Serious vs. Moderate Disease<br>on Admission | 2.10     | 0.69 | 8.16 (2.29, 35.89)     | 0.002   |
| Δ Albumin (g/dL)                             | -2.99    | 0.99 | 0.05 (0.01, 0.30)      | 0.003   |
| <b>Model S4</b>                              |          |      |                        |         |
| SPO <sub>2</sub> (%)                         | -0.21    | 0.09 | 0.81 (0.67, 0.95)      | 0.01    |
| Δ Albumin (g/dL)                             | -3.17    | 1.00 | 0.04 (0, 0.25)         | 0.001   |
| <b>Model S5*</b>                             |          |      |                        |         |
| CRP (mg/dL)                                  | 0.17     | 0.06 | 1.19 (1.06, 1.38)      | 0.008   |
| Δ Albumin (g/dL)                             | -3.30    | 1.36 | 0.04 (0, 0.40)         | 0.02    |
| <b>Model S6**</b>                            |          |      |                        |         |
| Ferritin (ng/mL)                             | 0.00     | 0.00 | 1.00 (1.00, 1.00)      | 0.047   |

|                  |       |      |                |       |
|------------------|-------|------|----------------|-------|
| Δ Albumin (g/dL) | -3.98 | 1.34 | 0.02 (0, 0.18) | 0.003 |
|------------------|-------|------|----------------|-------|

**Model S7**

|                |      |      |                   |       |
|----------------|------|------|-------------------|-------|
| Neutrophil (%) | 0.09 | 0.03 | 1.10 (1.03, 1.18) | 0.008 |
|----------------|------|------|-------------------|-------|

|                  |       |      |                   |       |
|------------------|-------|------|-------------------|-------|
| Δ Albumin (g/dL) | -3.05 | 0.99 | 0.05 (0.01, 0.27) | 0.002 |
|------------------|-------|------|-------------------|-------|

**Model S8**

|                         |      |      |                   |       |
|-------------------------|------|------|-------------------|-------|
| Total bilirubin (mg/dL) | 1.91 | 0.98 | 6.75 (0.97, 49.0) | 0.051 |
|-------------------------|------|------|-------------------|-------|

|                  |       |      |                   |        |
|------------------|-------|------|-------------------|--------|
| Δ Albumin (g/dL) | -3.52 | 1.02 | 0.03 (0.00, 0.18) | <0.001 |
|------------------|-------|------|-------------------|--------|

---

\* Baseline CRP was not performed in all patients (n = 52/93 in derivation set with CRP)

\* Baseline Ferritin was not performed in all patients (n = 45/93 in derivation set with Ferritin)

Δ Albumin (g/dL) = Total Albumin Change (baseline to nadir); CRP= C-Reactive Protein; SE = Standard Error; SPO<sub>2</sub> = Pulse Oximeter Oxygen Saturation;
